# Supplementary material
Source: PubMed Central journal article supplement (PMC4158103)

Supplemental Online Material

Flow of participants through the Bucharest Early Intervention Project: Institution (randomized) and Community (not randomized) by 8 year assessment

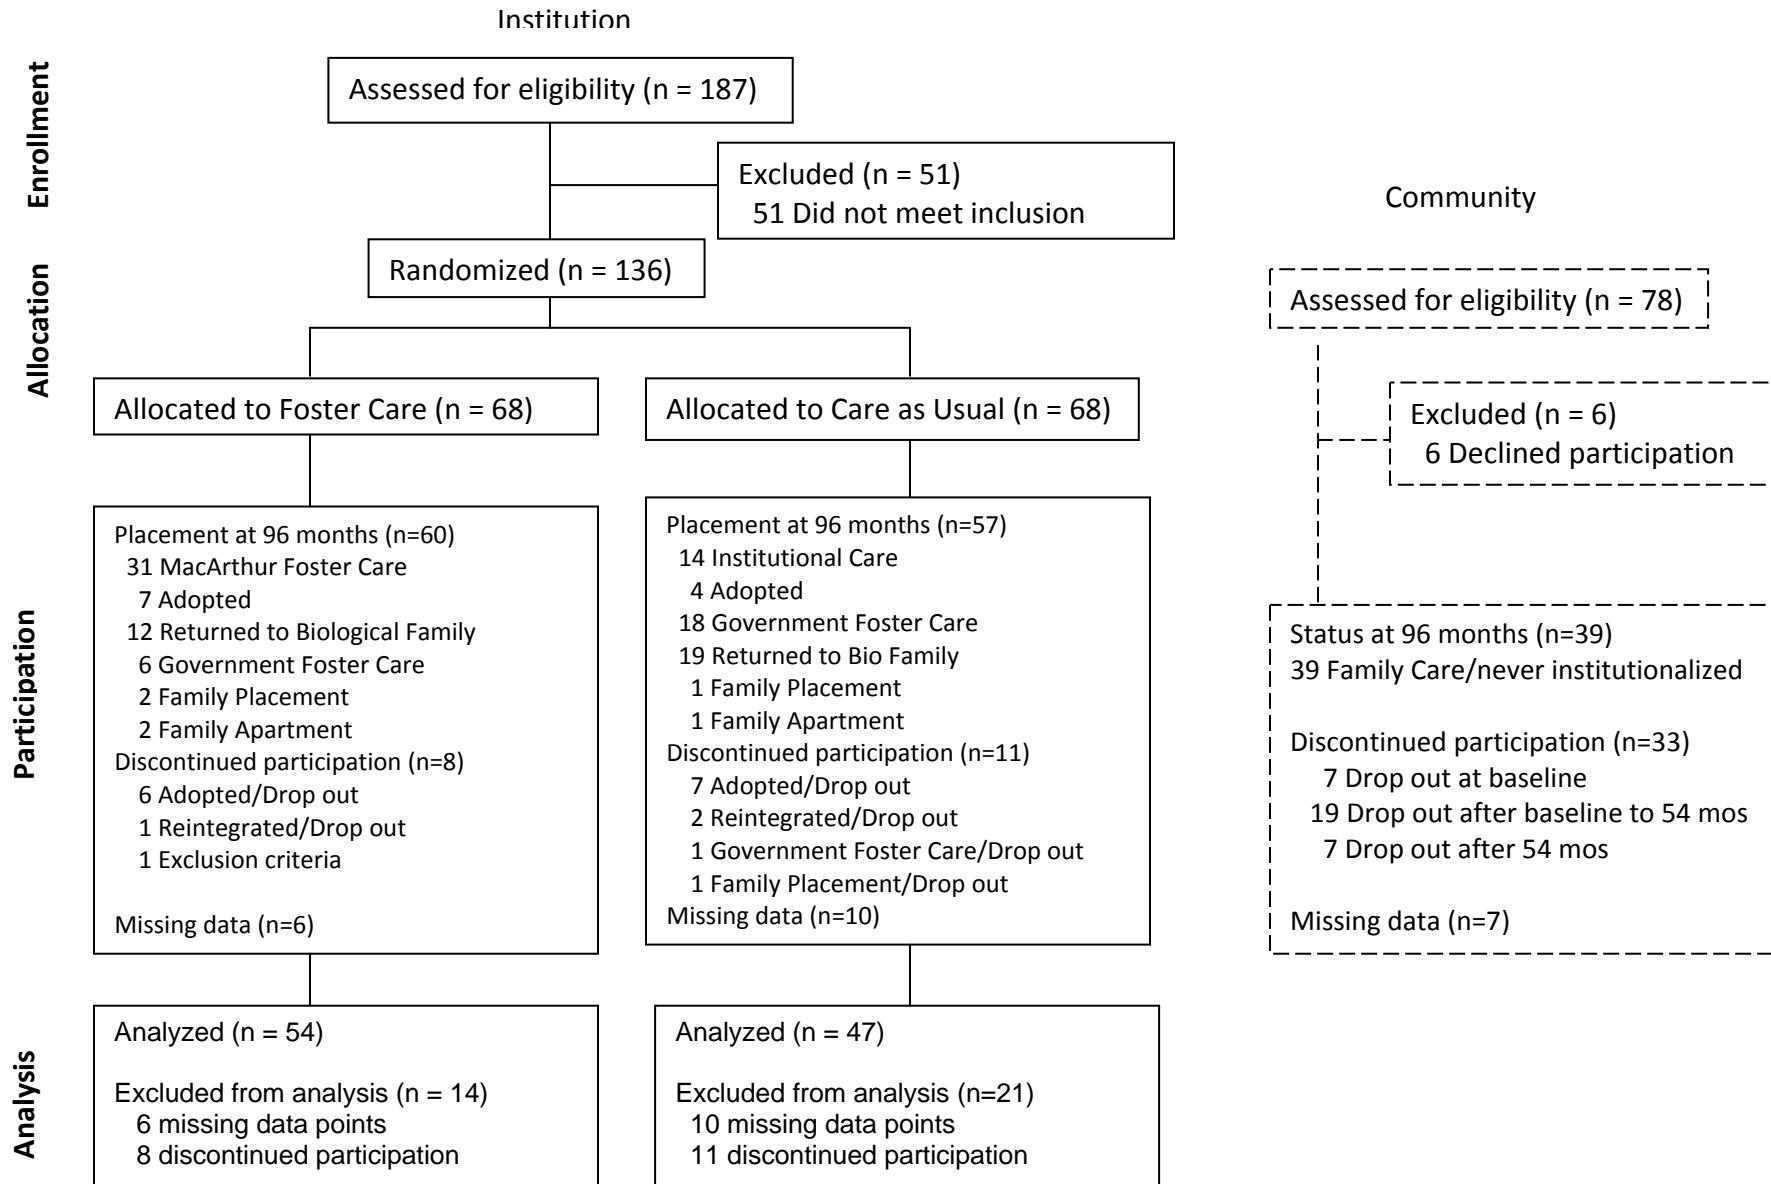

Supplement: NIHMS612037-supplement-Consort_Diagram.pdf [file NIHMS612037-supplement-Consort_Diagram.pdf]
